# Supplementary material for: Surgical and Functional Outcome after Resection of 64 Petroclival Meningiomas
Source: MDPI journal article supplement (doi:10.3390/cancers14184517), 2022-09-17
Supplement: s1 [file s1]

Supplementary

# Surgical and functional outcome after resection of 64 petro-clival meningiomas

Table S1. Simpson Grading System.

|                                                                                                                                                                     |          |
|---------------------------------------------------------------------------------------------------------------------------------------------------------------------|----------|
| <b>Macroscopically complete removal of tumour, with excision of its dural attachment, and of any abnormal bone. Includes resection of venous sinus if involved.</b> | <b>I</b> |
| Macroscopically complete removal of tumour and its visible extensions with coagulation of its dural attachment.                                                     | II       |
| Macroscopically complete removal of the intradural tumour, without resection or coagulation of its dural attachment or its extradural extensions.                   | III      |
| Partial removal, leaving intradural tumour in situ.                                                                                                                 | IV       |
| Simple decompression, with or without biopsy                                                                                                                        | V        |
